# Love at first flight: Wing interference patterns are species-specific and sexually dimorphic in blowflies (Diptera: Calliphoridae)

Nathan J. Butterworth<sup>1\*</sup>, Thomas E. White<sup>2</sup>, Phillip G. Byrne<sup>1</sup>, James F. Wallman<sup>1,3</sup>

<sup>1</sup>*School of Earth, Atmospheric and Life Sciences, University of Wollongong, Wollongong, NSW 2522, Australia*

<sup>2</sup>*School of Life and Environmental Sciences, The University of Sydney, NSW 2006, Australia*

<sup>3</sup>*School of Life Sciences, University of Technology Sydney, Ultimo, NSW 2007, Australia*

\*Corresponding author

**Email:** nb187@uowmail.edu.au

**Keywords** – wing interference patterns, Calliphoridae, vision, flies, sexual selection, Diptera

## 1 **Abstract**

2 Wing interference patterns (WIPs) are stable structural colours displayed on insect wings  
3 which are only visible at specific viewing geometries and against certain backgrounds. These  
4 patterns are widespread among flies and wasps, and growing evidence suggests that they may  
5 function as species- and sex-specific mating cues in a range of taxa. As such, it is expected  
6 that WIPs should differ between species and show clear sexual dimorphisms. However, the  
7 true extent to which WIPs vary between species, sexes, and individuals is currently unclear,  
8 as previous studies have only taken a qualitative approach, without considering how WIPs  
9 might be perceived by the insect. Here, we perform the first quantitative analysis of inter- and  
10 intra-specific variation in WIPs across seven Australian species of the blowfly genus  
11 *Chrysomya*. Using multispectral digital imaging and a tentative model of blowfly colour  
12 vision, we provide quantitative evidence that WIPs are species-specific, highlight that the  
13 extent of divergence is greater in males than in females, and demonstrate sexual dimorphisms  
14 in several species. These data provide evidence that WIPs have diversified substantially in  
15 blowflies and suggests that sexual selection may have played a role in this process.

16

17

18

19

20

21

22

23

24

25

26

## 27 INTRODUCTION

28 When considering the vast suite of signals involved in animal communication, few capture the  
29 collective human interest more than those involving vision. Visual signals have been studied  
30 across an enormous variety of animal taxa, from birds (Dale et al. 2015), to frogs (Bell et al.  
31 2017), lizards (McDiarmid et al. 2017), fish (Gerlach et al. 2014), spiders (Girard et al. 2011),  
32 and flies (White et al. 2019). Despite the breadth of this work, research continues to unravel  
33 novel modes of visual communication. Recently, there have been many discoveries of cryptic  
34 modes of visual communication – signals that are visible only to select audiences or under  
35 certain ecological settings. These inconspicuous signals are particularly prevalent among  
36 insects, most likely due to their unique and diverse visual ecologies (Lunau 2014). Examples  
37 include UV iridescent wing-spots that can only be seen from particular viewing angles (White  
38 et al. 2015), high-frequency wing-flashes that require rapid visual processing to be perceived  
39 (Eichorn et al. 2017), and colourful thin-film wing interference patterns (WIPs) that only  
40 appear at specific geometries and against certain backgrounds (Shevstova et al. 2011;  
41 Katayama et al. 2014).

42 WIPs are particularly widespread, and are found across all Hymenoptera, Diptera, Odonata,  
43 and some Hemiptera (Shevstova et al. 2011; Simon 2013; Brydegaard et al. 2018). They appear  
44 as brilliant patterns of colour that span the entire wing and are caused by the same process that  
45 leads to the array of colours seen in bubbles of soap. This process is referred to as two-beam  
46 thin film interference, and is caused by the interaction between light and the chitinous wing  
47 membrane. The specific geometry, hue, and intensity of insect WIPs is dependent on several  
48 variable aspects of wing morphology, including: 1) membrane thickness, since areas of  
49 differing thickness will reflect different interference colours, 2) wing corrugation, which  
50 scatters light in a coherent manner and determines the angle of interference reflection, and 3)  
51 the placement of microtrichia, which produces spherical reflection around the base of each

52 hair, resulting in a more ‘pebbled’ WIP appearance (Shevstova et al. 2011). Importantly, while  
53 WIPs remain stable over the lifespan of individuals (and even long after death), they exhibit  
54 limited-view iridescence, whereby the visibility of the pattern diminishes at acute geometries  
55 and against certain backgrounds (Shevstova et al. 2011).

56 While it is well known that many insect taxa possess exceptional vision and are capable of  
57 perceiving and discriminating colours (Hymenoptera: Peitsch et al. 1992; Diptera: Lunau  
58 2014), the biological function of WIPs has long been overlooked. However, a growing body of  
59 research suggests that they may function as species- and sex-specific mating cues across a wide  
60 range of insects. In support of this, WIPs have been reported to be qualitatively species-specific  
61 across many Diptera (Shevstova et al. 2011), Hymenoptera (Buffington and Sandler 2011;  
62 Shevtsova and Hansson 2011), and Hemiptera (Simon 2013) – including between closely  
63 related species. There is also direct evidence that WIPs play an important role in sexual  
64 behaviour, as they have been correlated with male mating success and shown to evolve in  
65 response to sexual selection in *Drosophila* species (Katayama et al. 2014; Hawkes et al. 2019).

66 Despite this apparent role in reproduction, WIPs have been studied in less than 0.01% of insects  
67 – and there have been no attempts to quantitatively assess inter- and intra-specific variation.  
68 Most previous comparative studies have only approached WIP analysis from a qualitative  
69 perspective, without statistical interpretation, and without considering how WIPs are perceived  
70 by the viewer (Buffington and Sandler 2011; Shevstova et al. 2011; Shevstova and Hansson  
71 2011; Simon 2013). Furthermore, of the few studies that have quantitatively measured WIPs,  
72 none have explicitly tested whether WIPs are species-specific or sexually dimorphic  
73 (Katayama et al. 2014; Brydegaard et al. 2018; Hawkes et al. 2019). As such, our current  
74 understanding of how WIPs vary between species, sexes, and individuals, is lacking. To  
75 address this, there is a need for studies that quantify inter- and intra-specific variation across a  
76 range of taxa, particularly in a quantitative and viewer-dependent context. Such comparative

77 studies are necessary for informing hypotheses regarding the biological function of WIPs,  
78 while also serving as a quantitative basis for the use of WIPs in insect taxonomy.

79 The blowflies (Diptera: Calliphoridae) provide an ideal system to investigate the diversity and  
80 function of WIPs. Blowflies possess exceptional visual acuity and colour vision (Kirschfield  
81 1983; van Hateren et al. 1989; Lunau 2014), and many species rely heavily on visual cues for  
82 sexual communication (Jones et al. 2014; Eichorn et al. 2017; Butterworth et al. 2019). These  
83 characteristics are especially apparent in the genus *Chrysomya*, in which many species exhibit  
84 sexually dimorphic eye morphology, in the form of holoptic eyes and ocular ‘bright zones’ in  
85 males (van Hateren et al. 1989), which are presumably involved in the recognition of light-  
86 based mating signals. Further to this, vision appears to play an important role in the sexual  
87 behaviour of two Australian species; *Ch. varipes* (Jones et al. 2014) and *Ch. flavifrons*  
88 (Butterworth et al. 2019). Here, we address this topic by quantitatively assessing the inter-and  
89 intra-specific variation of WIPs across seven species of Australasian *Chrysomya*. Considering  
90 their heavy reliance on visual signals in mate choice and recognition, and the diversity of their  
91 sexual behaviour we predict that WIPs will be highly species-specific and sexually dimorphic  
92 in this genus.

## 93 **METHODS**

### 94 *Flies*

95 Wild flies of seven species of Australian *Chrysomya* (*Ch. rufifacies*, *Ch. incisuralis*, *Ch.*  
96 *varipes*, *Ch. flavifrons*, *Ch. megacephala*, *Ch. saffranaea*, and *Ch. semimetallica*) were hand  
97 netted over carrion bait between Wollongong, NSW and Brisbane, Queensland between  
98 October 2018 and March 2019. A total of 10 - 20 adults of each sex were collected, euthanised,  
99 and brought back to the lab at the University of Wollongong. Both left and right wings were  
100 removed from each fly and suspended between a glass slide and coverslip to be later

101 photographed, for a total of 413 wings. As flies age, substantial damage and fraying occurs  
102 along the wing margin, and out of the 413 wings retrieved from wild specimens, only 231 were  
103 suitably intact for imaging and analysis.

#### 104 ***Photos***

105 Wings were mounted with transparent UHU glue onto a custom rotating stage and positioned  
106 at a 45° angle which maximised WIP visibility. Photos were taken of both the left and right  
107 wing of each fly with a MZ16A stereomicroscope mounted with a Leica DFC295 digital  
108 microscope colour camera. All photos were taken at the same magnification, under  
109 standardised and uniformly diffuse lighting provided by a Leica LED5000 HDI illuminator.  
110 The Leica DFC295 produces non-linear images (in the visible spectrum), which are unsuitable  
111 for objective measurement (Hawkes et al. 2019). As such, we processed our whole-wing  
112 images using the Multispectral Image Analysis and Calibration Toolbox for ImageJ (MICA  
113 toolbox) (Troscianko et al. 2019). This produces linearized, calibrated images which allow for  
114 the measurement of relative reflectances. We calibrated our images against a 3% reflectance  
115 standard from an X-rite colour checker passport, which was placed 5 mm below the wing in  
116 the background of each photo. This resulted in a total of 231 multispectral images (visible  
117 spectrum only) of left and right wings across the seven *Chrysomya* species.

118 From these multispectral images, we were able to take measurements of the average values of  
119 red, green, and blue (RGB) channels (hereafter referred to as mean ‘colour’) and the standard  
120 deviation in RGB (hereafter referred to as ‘colour contrast’) across five individual wing cells  
121 (Figure 1) as well as a measurement of the entire wing. Based on these measurements, wing  
122 cells that consisted of a single colour (i.e. only red) would have a high mean colour, but low  
123 contrast, while wing cells that consisted of several colours would have high contrast (Hawkes  
124 et al. 2019). In addition to this viewer-independent analysis, we used a cone-mapping approach

125 to convert the multispectral images into two viewer-subjective formats; the CIELab model of  
126 human colour sensation, and a receptor-based model of ‘blowfly vision’ based on the visual  
127 phenotype of *Calliphora*. Using these different models (RGB, CIELab, blowfly) we were able  
128 to assess the robustness of our results across three independent datasets. CIELab is a  
129 perceptually uniform model of human vision, whereby ‘L’ represents lightness, ‘a’ represents  
130 values on a green-red axis, and ‘b’ represents values on a blue-yellow axis. We measured the  
131 average L, a, and b pixel values (hereafter referred to as human ‘colour’) and standard deviation  
132 in L, a, and b pixel values (hereafter referred to as human ‘colour contrast’). The CIELab model  
133 allowed us to validate whether human-perceived qualitative differences in WIPs translate to  
134 quantitative differences – which will be important for their use in insect taxonomy. For the  
135 blowfly visual model, we were unable to measure UV reflectance due to the limitations of our  
136 digital microscope camera. As such, we created a simple receptor-based model of blowfly  
137 colour vision, based on the long-wavelength sensitivities of *Calliphora* (Kirschfield 1983;  
138 Hardie and Kirschfield 1983), as there are no published receptor sensitivities for *Chrysomya*  
139 species. We assumed involvement of the R8p (Rh5 opsin) and R8y (Rh6 opsin) receptors,  
140 which partly mediate colour vision (Lunau 2014), as well as the R1-6 receptors (Rh1 opsin)  
141 which contribute to both colour and luminance vision in flies (Schnaitmann et al. 2013). We  
142 estimated the mean quantum catch of Rh5, Rh6 and Rh1 (hereafter blowfly ‘colour’) as well  
143 as their standard deviation (hereafter blowfly ‘colour contrast’) across each of five individual  
144 wing cells, as well as the entire wing. This blowfly model allowed us to assess WIP variation  
145 in the context of the most ecologically relevant viewer, and the likely agent of selection on  
146 these patterns.

#### 147 ***Statistical analysis***

148 To broadly assess the patterns of variation in the wing interference patterns of Australian  
149 *Chrysomya*, we first assessed the effects of species, sex, and wing side (left or right) on WIP

150 variation. To do this, we first added a small constant (0.1) to each dataset (RGB, CIELab, and  
151 blowfly) to remove zeros associated with damaged wing-sections that were not measured. We  
152 then scaled each dataset using the inbuilt R scale function (R Core Team 2019) and performed  
153 a redundancy discriminant analysis (RDA) on each using the R packages ‘vegan’ (Oksanen et  
154 al. 2019) and ‘RVAideMemoire’ (Hervé 2019). To validate the effect of species, sex, and wing  
155 on WIP variation, the total percentage of constrained variance explained by the three factors  
156 was estimated by a canonical  $R^2$  called the ‘bimultivariate redundancy statistic’ (Miller and  
157 Farr 1971; Peres-Neto et al. 2006; Hervé et al. 2018). For the RGB, CIELab, and blowfly  
158 datasets species, sex, wing, and their interactions explained 46% (RGB), 38% (CIELab), and  
159 51% (Blowfly) of the total variation in WIP colour and 62% (RGB), 58% (CIELab), and 53%  
160 (Blowfly) of the total variation in WIP colour contrast. To test whether these constrained  
161 variances constituted a significant proportion of the variation in each dataset, permutation  $F$ -  
162 tests based on the canonical  $R^2$  were performed (Legendre and Legendre 2012; Hervé et al.  
163 2018). The tests were all declared significant (PERMANOVA;  $P < 0.001$ ), which implies that  
164 the chosen factors (species, sex, and wing) explained a significant proportion of the total  
165 variation in colour and contrast in each of the three datasets. As such, to test for the individual  
166 effects of each factor, a second permutation  $F$ -test was performed for species, sex, wing and  
167 the species  $\times$  sex  $\times$  wing interaction.

168 To assess the differences between species while accounting for sex-specific variance, we  
169 separated the CIELab and blowfly datasets into male and female datasets and performed two  
170 further RDAs. For these analyses, we used only measurements from the left wings, as  
171 preliminary inspections showed asymmetries between left and right wings within species  
172 (Figures S1 & S2). For the female datasets, species explained 34% (CIELab) and 51%  
173 (Blowfly) of the total variation in WIP colour and 54% (CIELab) and 59% (Blowfly) of the  
174 total variation in WIP colour contrast. For the male datasets, species explained 36% (CIELab)



175 and 45% (Blowfly) of the total variation in WIP colour and 58% (CIELab) and 47% (Blowfly)  
176 of the total variation in WIP colour contrast. To test whether these variances constituted a  
177 significant proportion of the data, permutation  $F$ -tests based on the canonical  $R^2$  were  
178 performed. The tests were all declared significant (PERMANOVA;  $P < 0.001$ ), which implies  
179 that differences in colour and colour contrast between species explained a substantial portion  
180 of the total variation of each dataset. As such, a pairwise comparison using the function  
181 ‘pairwise.factorfit’ from ‘RVAideMemoire’ was used to specifically assess which species  
182 differed significantly from each other within the male and female datasets. Lastly, to assess  
183 intra-specific variation (i.e. whether WIPs were sexually dimorphic), datasets were separated  
184 into species, resulting in seven individual CIELab datasets and seven individual blowfly  
185 datasets. To consider the effect of sex, each dataset was scaled with the inbuilt R function, and  
186 principal component analysis (PCA) was conducted. Univariate analysis of variance (ANOVA)  
187 was then performed on the extracted PCs from each dataset to test for significant differences  
188 in PCs (representing colour or contrast) between male and female wings. All PCA and ANOVA  
189 analyses were performed using the R base package (R Core Team 2019), the ‘Factoextra’  
190 package (Kassambra and Mundt 2017), and the ‘ggFortify’ package (Tang et al. 2016).

191

## 192 **RESULTS**

193 Initial observations indicated that there was substantial inter-specific variation in WIPs, with  
194 clear differences between species. *Ch. rufifacies* and *Ch. incisuralis*, for example, showed  
195 vastly different WIPs compared to *Ch. flavifrons* and *Ch. varipes* (Figure 2). There were also  
196 noticeable intra-specific differences between male and female WIPs in both colour and colour  
197 contrast, particularly in *Ch. flavifrons* (Figure 2). Further to this, preliminary examination  
198 revealed asymmetries between left and right WIPs within individuals (Figures S1 & S2).

199 To assess these patterns of variation, while accounting for species, sex, and wing, RDA was  
200 performed. The RDA revealed that the combined effect of species, sex, and wing explained a  
201 significant proportion of overall variation in colour and contrast across RGB, CIELab and  
202 blowfly datasets. Of the constrained variance (the variance explained by all three factors),  
203 discriminant components 1-5 collectively accounted for 95.17% (RGB), 91.89% (CIELab),  
204 98.10% (blowfly) of the variation in colour, and 98.04% (RGB), 97.36% (CIELab), 97.58%  
205 (blowfly) of the variation in contrast. Permutation F-tests suggested that species  
206 (PERMANOVA;  $P < 0.001$ ), sex (PERMANOVA;  $P < 0.001$ ), and the species  $\times$  sex interaction  
207 (PERMANOVA;  $P < 0.001$ ) each individually explained a significant proportion of colour and  
208 colour contrast variation across all three models (RGB, CIELab and Blowfly) (Table S1).  
209 While wing also explained a significant proportion of colour variation in the RGB and CIELab  
210 datasets (PERMANOVA;  $P < 0.05$ ), this was not significant when considered as an interaction  
211 with species, sex, or species  $\times$  sex (Table S1). However, considering that there were  
212 asymmetries between mean values of left and right wings within species (though not  
213 statistically significant) (Figures S1 & S2) we opted to perform all subsequent analyses with  
214 left wings only.

### 215 *Inter-specific comparisons*

216 To assess how WIPs varied between species, we had to account for the sexual variation in WIP  
217 colour and contrast. To do so, a second RDA was performed on individual male and female  
218 datasets (for CIELab and blowfly visual space). The RDA revealed substantial inter-specific  
219 variation in WIPs in both the blowfly (Figure 3) and CIELab datasets (Figure S3), whereby  
220 species explained a significant proportion of the variation in male WIP colour (CIELab:  
221 35.74%; Blowfly: 45.24%), male WIP contrast (CIELab: 57.35%; Blowfly: 46.74%), female  
222 WIP colour (CIELab: 34.27%; Blowfly: 51.30%) and female WIP contrast (CIELab: 53.94%;  
223 Blowfly: 58.67%). Pairwise comparisons on the blowfly dataset (Table 1) showed that for

224 females, variation in WIP colour did not separate any species from their closest relatives  
225 (Pairwise comparison:  $P > 0.05$ ). However, female variation in WIP contrast clearly separated  
226 *Ch. varipes* from its sister species *Ch. flavifrons* (Pairwise comparison:  $P < 0.05$ ). In males,  
227 variation in WIP colour separated all species from their closest relatives (Pairwise  
228 comparisons:  $P < 0.05$ ), with the exception of *Ch. megacephala* and *Ch. saffraneae* (Pairwise  
229 comparisons:  $P > 0.05$ ). Similarly, male variation in WIP contrast separated all species from  
230 their closest relatives (Pairwise comparisons:  $P < 0.05$ ). Pairwise comparisons of the CIELab  
231 data showed similar results, whereby variation in both WIP colour and WIP contrast  
232 significantly separated all closely related species (Pairwise comparisons:  $P < 0.05$ ) (Table S2).

### 233 ***Intra-specific comparisons***

234 To investigate and visualize sex-specific differences within each of the seven species, we  
235 separated the CIELab and blowfly datasets by species. On each of these datasets PCA and  
236 univariate ANOVA were performed, revealing quantitative sexual dimorphisms in the blowfly  
237 data in WIP colour (Figure 4) and colour contrast (Figure 5) for several *Chrysomya* species.  
238 Similar patterns were observed in the CIELab datasets (Figure S4 & Figure S5). Of these sex-  
239 specific differences, the first five PCs explained a substantial proportion ( $>80\%$ ) of the overall  
240 variation in WIP colour and contrast in both the CIELab and blowfly datasets (Tables S3-a,  
241 S4-a, S5-a, S6-a). As such, ANOVA was performed on the first five PCs extracted from these  
242 datasets for each species. For the blowfly data, this revealed significant differences between  
243 male and female WIP colour in *Ch. rufifacies*, *Ch. flavifrons*, *Ch. megacephala* and *Ch.*  
244 *semimetallica* (Table S3-a). Further, WIP contrast also showed sex-specific differences in *Ch.*  
245 *rufifacies*, *Ch. flavifrons*, and *Ch. varipes* (Table S4-a). Similarly, the first five PCs extracted  
246 from the CIELab dataset showed sex-specific differences in WIP colour and contrast for all the  
247 above species, as well as for *Ch. saffraneae* (Tables S5-a & S6-a). To determine which variables  
248 (i.e. which aspects of colour and which wing cells) contributed to each principal component,

249 we used the ‘fviz\_contrib’ function from ‘factoextra’. To see which variables characterise the  
250 sexual differences in WIP colour and contrast for each of the seven *Chrysomya* species, see  
251 Tables S3-b, S4-b, S5-b and S6-b.

252

## 253 **DISCUSSION**

254 Wing interference patterns are widespread among insects, and accumulating evidence suggests  
255 that they may function as species- and sex-specific mating cues. Despite this, past inter- and  
256 intra-specific comparisons have been limited to qualitative assessments. Here, we provide  
257 quantitative evidence that WIPs are species-specific in the blowfly genus *Chrysomya*. We also  
258 show that the extent of divergence is greater in males than in females, and highlight significant  
259 sexual dimorphisms in several species. Our findings support the notion that WIPs may play an  
260 important role in blowfly mating behaviour by functioning as species- and sex-specific mating  
261 cues.

### 262 *Species differences*

263 Since the RGB, CIELab, and blowfly analyses all produced qualitatively similar results, the  
264 subsequent discussion will focus primarily on the results of the blowfly-based analyses, as  
265 these data represent the most ecologically relevant receiver. Our results highlight substantial  
266 diversification in WIPs in *Chrysomya*, with significant differences between several species,  
267 particularly between close relatives. Notably, the patterns of inter-specific variation differed  
268 between males and females; female differences in WIP colour (that is the average colour as  
269 measured in our blowfly model) did not separate close relatives, whereas female differences in  
270 WIP contrast (that is the number of contrasting colours as measured in our blowfly model)  
271 clearly separated female *Ch. varipes* from *Ch. flavifrons*. In males, divergence between species  
272 was greater, whereby the WIPs of most closely related species diverged substantially. For

273 example, WIP colour separated *Ch. incisuralis* from *Ch. rufifacies*, and *Ch. varipes* from *Ch.*  
274 *flavifrons*, while WIP contrast separated *Ch. saffranaea* from *Ch. megacephala*. These  
275 differences were even more pronounced in the CIELab data (Table S2), where almost every  
276 species separated based on WIP colour and WIP contrast. However, *Ch. megacephala* and *Ch.*  
277 *saffranaea* overlapped substantially in both the blowfly and CIELab datasets, indicating limited  
278 divergence in WIPs between these two very closely related species. Further to this, there was  
279 substantial overlap in both blowfly and CIELab measurements between the *Ch.*  
280 *megacephala/Ch. saffranaea* species group and the distantly related *Ch. incisuralis/Ch.*  
281 *rufifacies* species group, which suggests convergent evolution in WIP patterns in these two  
282 groups.

283 Our data also suggest that selection for WIP divergence differs between males and females.  
284 For example, *Ch. incisuralis* and *Ch. rufifacies* males differ based on WIP colour and WIP  
285 contrast, while females do not differ in either measurement. Likewise, males of *Ch. saffranaea*  
286 and *Ch. megacephala* differ in WIP colour contrast, but females do not differ in either  
287 measurement. Moreover, males of *Ch. varipes* and *Ch. flavifrons* differ in WIP colour and WIP  
288 contrast, while females only differ in WIP contrast. If blowfly WIPs are in fact used as mating  
289 cues, these results might suggest that WIP divergence is primarily driven by selection on male  
290 wings. This is supported by findings from previous work in *Drosophila* species, where male  
291 WIPs, but not female WIPs, have been shown to experience sexual selection (Hawkes et al.  
292 2019). Importantly, when comparing between males of different species (except *Ch. saffranaea*  
293 and *Ch. megacephala*) it was both the mean colour and colour contrast of WIPs that varied –  
294 suggesting that both aspects of the pattern may be relevant in the context of signalling. This is  
295 supported by findings in *Drosophila simulans* where there was evidence for sexual selection  
296 on average wing colour, colour contrast, as well as luminance, across the whole wing (Hawkes  
297 et al. 2019). As such, both the average colour of the WIP, and the number of contrasting colours

298 within, are likely to be important aspects of fly WIPs, and future studies should consider both  
299 traits when making comparisons.

300 It is also plausible that the species-specific differences in WIPs we report are unrelated to  
301 sexual selection but are instead a side effect of differences in body size and wing morphology  
302 between species. This is because body size and wing membrane thickness tend to scale  
303 allometrically (Wootton 1992) which has a direct effect on the colours reflected in WIPs.  
304 Specifically, the sequence of WIP colours corresponds to the Newton series reflected from a  
305 thin film of oil on water (Shevstova et al. 2011; Katayama et al. 2014). The first three Newton  
306 orders (0 to 550 nm wing membrane thickness) are the brightest and display a near complete  
307 scale of spectral colours, except for pure red. This explains why the smaller species, *Ch.*  
308 *varipes*, *Ch. flavifrons*, and *Ch. semimetallica* (~3-6 mm body length), with thinner wing  
309 membranes show brighter WIPs composed of blues, greens, yellows, and purples (Figure 2).  
310 Conversely, larger species with thicker wing membranes ( $\geq 550$  nm wing membrane thickness)  
311 appear to display duller WIPs (Buffington and Sandler 2011) composed of non-spectral (to the  
312 human eye) magentas and greens that gradually fade into uniform pale grey. This is apparent  
313 in the larger *Chrysomya* species (*Ch. incisuralis*, *Ch. rufifacies*, *Ch. megacephala* and *Ch.*  
314 *saffranae*; all ~8-12 mm body length) and explains why the WIPs of these species overlap  
315 substantially. Therefore, the substantial differences between the species pairs *Ch. varipes/Ch.*  
316 *flavifrons* and *Ch. incisuralis/Ch. rufifacies* can be primarily attributed to gross differences in  
317 body size and wing membrane thickness.

318 While larger blowfly species tended to display duller WIPs, the differences in colour patterns  
319 are still statistically distinct in our model of blowfly colour vision, separating *Ch. rufifacies*  
320 and *Ch. incisuralis* across several measurements. Therefore, it is plausible that even the duller  
321 WIPs of larger blowflies may still act as species- and sex-specific cues. Gross differences in  
322 body size cannot, however, explain the observed divergence in WIPs between species with

323 similar body and wing sizes. For example, male WIPs of *Ch. incisuralis* and *Ch. rufifacies*  
324 clearly diverge, but body and wing size are almost identical in both species. Likewise, in *Ch.*  
325 *varipes* and *Ch. flavifrons*, stark differences in WIPs are apparent between females of both  
326 species, even though they exhibit similar wing structure (Aldrich 1925). Therefore, the  
327 differences in WIPs between these closely related species must be due to more fine-scale  
328 differences in wing membrane thickness, perhaps restricted to specific parts of the wing. While  
329 these fine-scale, species-specific differences in wing structure may result from sexual selection  
330 on WIPs as species- and sex-specific signals, it is also likely that they are the result of differing  
331 ecological selection on wing morphology for flight performance (Taylor and Merriam 1995;  
332 DeVries et al. 2010).

### 333 *Sex differences*

334 If sexual selection has acted on the WIPs of male *Chrysomya*, then we might expect to see  
335 evidence of sexual dimorphism, either in WIP colour or colour contrast, across multiple  
336 species. Correspondingly, sexual dimorphism in PCs were apparent for five of the seven  
337 species. *Ch. rufifacies*, *Ch. flavifrons*, *Ch. megacephala*, and *Ch. semimetallica* all showed sex-  
338 specific differences in the average colour and contrast of WIPs. Whereas *Ch. varipes* only  
339 showed sex-specific differences in WIP colour contrast. Importantly, while the whole wing  
340 contributed to the sexual variation of some species, in most species it was specific wing cells  
341 that contributed most of the sex-specific variation (Table S3-b). This suggests that certain  
342 sections of the wing may be under stronger selection than others, and highlights that taking  
343 measurements across the whole wing can in fact cloud patterns of inter- and intra-specific  
344 variation. The use of highly localised colour patterns as signals has been demonstrated in many  
345 other animal taxa (Breuker and Brakefield 2002; Fleishman et al. 2017) and may partly explain  
346 why no sexual dimorphism was apparent across the whole wing measurements of *Drosophila*  
347 *simulans* (Hawkes et al. 2019).



348 The greatest degree of sexual dimorphism observed in the present study was in *Ch. flavifrons*  
349 – a species where visual cues are known to play a key role in mating behaviour during male  
350 courtship displays (Butterworth et al. 2019). This was predominantly driven by differences in  
351 the average colour of wing cell E, and the colour contrast of wing cells B and C. The sex-  
352 specific differences in the average colour of wing cell E are likely due to the fumosity (light  
353 brown pigmentation) extending from the wing margin of males, which is not present in females.  
354 Pigmentation is known to substantially affect interference colouration, likely constituting an  
355 important component of WIP displays in numerous flies and wasps (Shevstova et al. 2011) and  
356 has likely evolved as a component of the male courtship display in *Ch. flavifrons* (Butterworth  
357 et al. 2019). Nevertheless, sexual dimorphism was also observed in wing cells B and C of *Ch.*  
358 *flavifrons*, areas where no wing pigmentation is apparent. Likewise, sexual dimorphism was  
359 apparent in *Ch. rufifacies* and *Ch. semimetallica*, two species where neither male nor female  
360 wings exhibit pigmentation. These sex-specific differences must therefore be the result of  
361 minor differences in wing membrane thickness and corrugation, both of which may be the  
362 result of selection for sex-specific WIPs.

363 While sexual dimorphism is often the result of sexual selection, there are also numerous  
364 examples of sexual dimorphism being driven primarily by ecological selection (Slatkin 1984;  
365 Taylor et al. 2019). For example, sexually dimorphic wing morphology resulting from sex-  
366 specific selection on flight performance has been demonstrated in *Morpho* butterflies (DeVries  
367 et al. 2010). Similarly, flight performance is known to differ between male and female  
368 blowflies, as males are adapted to chase females mid-flight (Trischler et al. 2010). The  
369 necessity for males to track females, and rapidly adjust their trajectory during flight may  
370 therefore impose selective pressure on male wing morphology, which might not be experienced  
371 by females - hence leading to sexually dimorphic membrane thicknesses and WIPs, which are  
372 unrelated to signalling. However, it seems unlikely that selection for flight performance would



373 only result in minor changes to wing membrane thickness between the sexes, without more  
374 substantial differences in wing shape and size as is the case in *Morpho* butterflies (DeVries et  
375 al. 2010). Overall, we suggest that these differences may be primarily driven by sexual  
376 selection, particularly in *Ch. varipes* and *Ch. flavifrons*; two species where males perform  
377 complex courtship displays (Jones et al. 2014; Butterworth et al. 2019). These displays mirror  
378 those seen in *Drosophila* species, where WIPs almost certainly constitute an important  
379 component of the display (Katayama et al. 2014; Hawkes et al. 2019).

### 380 ***Conclusions***

381 In their comprehensive review of fly vision, Lunau et al. (2014) stated “Interestingly, only a  
382 few flies exhibit a dimorphism of coloured courtship signals, indicating that courtship and  
383 mating are based on cues other than colour”. Here, we provide quantitative evidence that WIPs  
384 are sexually dimorphic and differ substantially between closely related blowflies. This, in line  
385 with the recent findings that WIPs are under sexual selection in *Drosophila*, suggests that  
386 colour may play a greater role in fly mating behaviour than previously thought, and further  
387 substantiates WIPs as a promising avenue for research into colour-based mating signals in flies.  
388 However, the study of insect WIPs is still in its infancy, and while our results show substantial  
389 species- and sex-specific differences in the WIPs of Australian *Chrysomya* – it is unclear  
390 whether these patterns extend to other taxa, and whether they are driven by ecological selection  
391 on wing morphology or sexual selection on WIP appearance. Our findings should also be  
392 tempered by the fact that we used a tentative model of blowfly colour vision, and were unable  
393 to consider UV reflectance, which may also form an important part of WIP displays – although,  
394 evidence in *Drosophila simulans* suggests that UV may play only a minor role (Hawkes et al.  
395 2019). Furthermore, although we have demonstrated sexual dimorphisms in several parts of  
396 the wing, we used standardised and diffused lighting and a uniform background – so exactly

397 how these differences appear to blowflies in a natural setting remains unknown. In fact, there  
398 have been no studies of WIPs under ecologically relevant settings for any species, so there is  
399 still much to learn about which aspects of the WIP are displayed and perceptible to flies under  
400 field conditions. Lastly, there is a compelling need for more studies that combine multispectral  
401 imaging, a viewer-dependent model of analysis, and behavioural assays as per Hawkes et al.  
402 (2019). We suggest that *Ch. flavifrons* will be a good candidate for such studies in blowflies.

403

## 404 **ACKNOWLEDGEMENTS**

405 This project was supported by The Holsworth Wildlife Research Endowment & The Ecological  
406 Society of Australia. We thank Tracey Gibson and Natasha Mansfield for their contributions.  
407 NJB would also like to acknowledge Finlay Davidson and Sean Pryor for their support.

408

## 409 **REFERENCES**

- 410 Aldrich JM (1925) New Diptera or two-winged flies in the United States National Museum.  
411 *Proceedings of the United States National Museum* 66:1-36  
412 <https://doi.org/10.5479/si.00963801.66-2555.1>
- 413 Bell RC, Webster GN, Whiting M.J. (2017) Breeding biology and the evolution of dynamic sexual  
414 dichromatism in frogs. *Journal of Evolutionary Biology* 30:2104-2115 doi:10.1111/jeb.13170
- 415 Breuker CJ, Brakefield PM (2002) Female choice depends on size but not symmetry of dorsal  
416 eyespots in the butterfly *Bicyclus anynana*. *Proceedings of the Royal Society B: Biological*  
417 *Sciences* 269:1233-1239 doi:10.1098/rspb.2002.2005
- 418 Brydegaard M, Jansson S, Schulz M, Runemark A (2018) Can the narrow red bands of dragonflies be  
419 used to perceive wing interference patterns? *Ecology and Evolution* 8:5369-5384  
420 doi:10.1002/ece3.4054
- 421 Buffington ML, Sandler RJ (2012) The occurrence and phylogenetic implications of wing interference  
422 patterns in Cynipoidea (Insecta: Hymenoptera). *Invertebrate Systematics* 25:586-597
- 423 Butterworth NJ, Byrne PG, Wallman JF (2019) The blow fly waltz: Field and laboratory observations  
424 of novel and complex dipteran courtship behavior. *Journal of Insect Behavior* 32:109-119  
425 doi:10.1007/s10905-019-09720-1
- 426 Dale J, Dey CJ, Delhey K, Kempnaers B, Valcu M (2015) The effects of life history and sexual  
427 selection on male and female plumage colouration. *Nature* 527:367-370  
428 doi:10.1038/nature15509
- 429 DeVries PJ, Penz CM, Hill RI (2010) Vertical distribution, flight behaviour and evolution of wing  
430 morphology in *Morpho* butterflies. *Journal of Animal Ecology* 79:1077-1085  
431 doi:10.1111/j.1365-2656.2010.01710.x

- 432 Eichorn C, Hrabar M, Van Ryn EC, Brodie BS, Blake AJ, Gries G (2017) How flies are flirting on the  
433 fly. *BMC Biology* 15:1-9 doi:10.1186/s12915-016-0342-6
- 434 Fleishman LJ, Yeo AI, Perez CW (2017) Visual acuity and signal color pattern in an *Anolis* lizard.  
435 *The Journal of Experimental Biology* 220:2154 doi:10.1242/jeb.150458
- 436 Gerlach T, Sprenger D, Michiels NK (2014) Fairy wrasses perceive and respond to their deep red  
437 fluorescent coloration. *Proceedings of the Royal Society B: Biological Sciences*  
438 281:20140787 doi:10.1098/rspb.2014.0787
- 439 Girard MB, Kasumovic MM, Elias DO (2011) Multi-modal courtship in the peacock spider, *Maratus*  
440 *volans* (O.P.-Cambridge, 1874). *PLoS One* 6:e25390 doi:10.1371/journal.pone.0025390
- 441 Hardie RC, Kirschfeld K (1983) Ultraviolet sensitivity of fly photoreceptors R7 and R8: Evidence for  
442 a sensitising function. *Biophysics of Structure and Mechanism* 9:171-180  
443 doi:10.1007/BF00537814
- 444 Hawkes MF, Duffy E, Joag R, Skeats A, Radwan J, Wedell N, Sharma MD, Hosken DJ, Troschianko J  
445 (2019) Sexual selection drives the evolution of male wing interference patterns *Proceedings*  
446 *of the Royal Society B: Biological Sciences* 286:20182850 doi:10.1098/rspb.2018.2850
- 447 Hervé MR, Nicolè F, Lê Cao K-A (2018) Multivariate analysis of multiple datasets: A practical guide  
448 for chemical ecology. *Journal of Chemical Ecology* 44:215-234 doi:10.1007/s10886-018-  
449 0932-6
- 450 Hervé MR (2020) RVAideMemoire: Testing and plotting procedures for biostatistics. R package  
451 version 0.9-74. <https://cran.r-project.org/package=RVAideMemoire>
- 452 Jones SD, Byrne PG, Wallman JF (2014) Mating success is predicted by the interplay between  
453 multiple male and female traits in the small hairy maggot blowfly. *Animal Behaviour* 97:193-  
454 200 doi:10.1016/j.anbehav.2014.09.022
- 455 Kassambara A, Mundt F (2017) factoextra: Extract and visualize the results of multivariate data  
456 analyses. R Package Version 1.0.4. <https://CRAN.R-project.org/package=factoextra>
- 457 Katayama N, Abbott JK, Kjærandsen J, Takahashi Y, Svensson EI (2014) Sexual selection on wing  
458 interference patterns in *Drosophila melanogaster*. *Proceedings of the National Academy of*  
459 *Sciences of the United States of America* 111:15144-15148 doi:10.1073/pnas.1407595111
- 460 Kirschfeld K, Feiler R, Hardie R, Vogt K, Franceschini N (1983) The sensitizing pigment in fly  
461 photoreceptors. *Biophysics of Structure and Mechanism* 10:81-92 doi:10.1007/BF00535544
- 462 Koshio C, Muraji M, Tatsuta H, Kudo S-I (2007) Sexual selection in a moth: effect of symmetry on  
463 male mating success in the wild. *Behavioral Ecology* 18:571-578 doi:10.1093/beheco/arm017
- 464 Legendre P, Legendre, LF (2012) Numerical Ecology Elsevier, Amsterdam, The Netherlands
- 465 Lunau K (2014) Visual ecology of flies with particular reference to colour vision and colour  
466 preferences. *Journal of Comparative Physiology A* 200:497-512 doi:10.1007/s00359-014-  
467 0895-1
- 468 McDiarmid CS, Friesen CR, Ballen C, Olsson M (2017) Sexual coloration and sperm performance in  
469 the Australian painted dragon lizard, *Ctenophorus pictus*. *Journal of Evolutionary Biology*  
470 30:1303-1312 doi:10.1111/jeb.13092
- 471 McLachlan AJ (2010) Fluctuating asymmetry in flies, what does it mean? *Symmetry* 2:1099-1107  
472 doi:10.3390/sym2021099
- 473 Miller JK, Farr SD (1971) Bimultivariate redundancy: A comprehensive measure of interbattery  
474 relationship. *Multivariate Behavioral Research* 6:313-324 doi:10.1207/s15327906mbr0603\_4
- 475 Møller AP, Pomiankowski A (1993) Fluctuating asymmetry and sexual selection. *Genetica* 89:267  
476 doi:10.1007/BF02424520
- 477 Oksanen J, Blanchet G, Friendly M, Kindt R, Legendre P, McGlenn D, Minchin PR, O'Hara RB,  
478 Simpson GL, Solymos P, Stevens MHH, Szoecs E and Wagner H (2019) vegan: Community  
479 ecology package. R package version 2.5-5. <https://CRAN.R-project.org/package=vegan>
- 480 Peitsch D, Fietz A, Hertel H, de Souza J, Ventura DF, Menzel R (1992) The spectral input systems of  
481 hymenopteran insects and their receptor-based colour vision. *Journal of Comparative*  
482 *Physiology A* 170:23-40 doi:10.1007/BF00190398
- 483 Peres-Neto PR, Legendre P, Dray S, Borcard D (2006) Variation partitioning of species data matrices:  
484 Estimating and comparison of fractions. *Ecology* 87:2614-2625 doi:10.1890/0012-  
485 9658(2006)87[2614:VPOSDM]2.0.CO;2

- 486 R Core Team (2019). R: A language and environment for statistical computing. R Foundation for  
487 Statistical Computing, Vienna, Austria. URL <https://www.R-project.org/>.
- 488 Schnaitmann C, Garbers C, Wachtler T, Tanimoto H (2013) Color discrimination with broadband  
489 photoreceptors. *Current Biology* 23:2275-2282 doi:10.1016/j.cub.2013.10.037
- 490 Shevtsova E, Hansson C (2011) Species recognition through wing interference patterns (WIPs) in  
491 *Achrysocharoides* Girault (Hymenoptera, Eulophidae) including two new species. *ZooKeys*  
492 154:9-30 doi:10.3897/zookeys.154.2158
- 493 Shevtsova E, Hansson C, Janzen DH, Kjærandsen J (2011) Stable structural color patterns displayed  
494 on transparent insect wings. *Proceedings of the National Academy of Sciences of the United*  
495 *States of America* 108:668-673 doi:10.1073/pnas.1017393108
- 496 Simon E (2013) Preliminary study of wing interference patterns (WIPs) in some species of soft scale  
497 (Hemiptera, Sternorrhyncha, Coccoidea, Coccidae). *ZooKeys* 319:269-281  
498 doi:10.3897/zookeys.319.4219
- 499 Slatkin M (1984) Ecological Causes of Sexual Dimorphism. *Evolution* 38:622-630  
500 doi:10.2307/2408711
- 501 Tang Y, Horikoshi M, Li W (2016) ggfortify: Unified interface to visualize statistical result of popular  
502 R packages. *The R Journal* 8 <https://journal.r-project.org/>.
- 503 Taylor LA, Cook C, McGraw KJ (2019) Variation in activity rates may explain sex-specific dorsal  
504 color patterns in *Habronattus* jumping spiders *PLoS One* 14:e0223015  
505 doi:10.1371/journal.pone.0223015
- 506 Taylor PD, Merriam G (1995) Wing morphology of a forest damselfly is related to landscape  
507 structure. *Oikos* 73:43-48 doi:10.2307/3545723
- 508 Trischler C, Kern R, Egelhaaf M (2010) Chasing behavior and optomotor following in free-flying  
509 male blowflies: flight performance and interactions of the underlying control systems.  
510 *Frontiers in Behavioral Neuroscience* 4:20-20 doi:10.3389/fnbeh.2010.00020
- 511 Troje N (1993) Spectral categories in the learning behaviour of blowflies. *Zeitschrift für*  
512 *Naturforschung C* 48:96-104 doi:10.1515/znc-1993-1-218
- 513 Troscianko J, Stevens M (2015) Image calibration and analysis toolbox– a free software suite for  
514 objectively measuring reflectance, colour and pattern. *Methods in Ecology and Evolution*  
515 6:1320-1331 doi:10.1111/2041-210X.12439
- 516 Uetz GW, Smith EI (1999) Asymmetry in a visual signaling character and sexual selection in a wolf  
517 spider. *Behavioral Ecology and Sociobiology* 45:87-93 doi:10.1007/s002650050542
- 518 Van Hateren J, Hardie R, Rudolph A, Laughlin S, Stavenga D (1989) The bright zone, a specialized  
519 dorsal eye region in the male blowfly *Chrysomya megacephala* *Journal of Comparative*  
520 *Physiology A* 164:297-308 doi:10.1007/BF00612990
- 521 White TE, Vogel-Ghibely N, Butterworth NJ (2019) Flies exploit predictable perspectives and  
522 backgrounds to enhance iridescent signal salience and mating success. *The American*  
523 *Naturalist* doi:10.1086/707584
- 524 White TE, Zeil J, Kemp DJ (2015) Signal design and courtship presentation coincide for highly biased  
525 delivery of an iridescent butterfly mating signal. *Evolution* 69:14-25 doi:10.1111/evo.12551
- 526 Windig JJ, Nylin S (1999) Adaptive wing asymmetry in males of the speckled wood butterfly  
527 (*Pararge aegeria*)? *Proceedings of the Royal Society B: Biological Sciences* 266:1413-1418  
528 doi:10.1098/rspb.1999.0795
- 529 Wootton RJ (1992) Functional morphology of insect wings. *Annual Review of Entomology* 37:113-  
530 140 doi:10.1146/annurev.en.37.010192.000553
- 531

## FIGURES AND TABLES

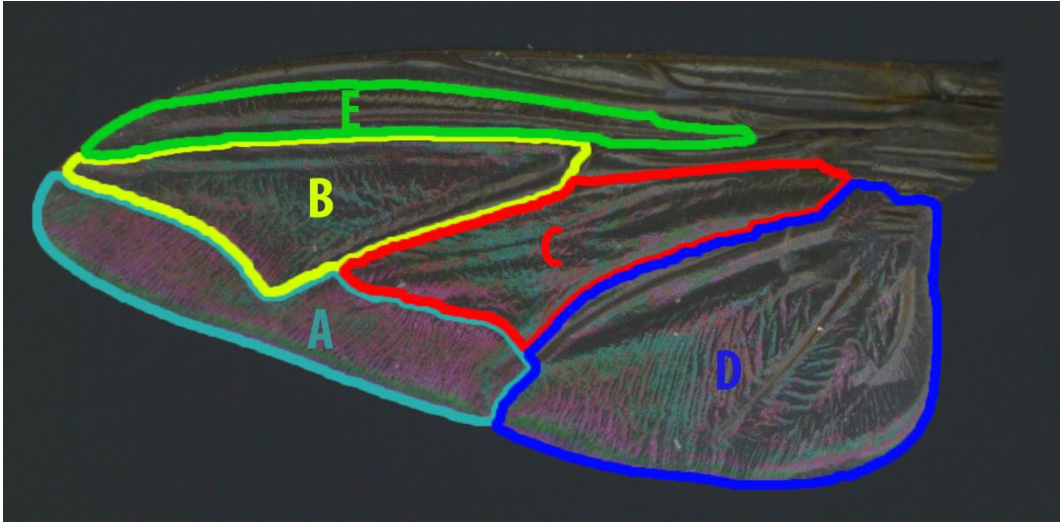

**Figure 1.** The five wing cells used for mean and standard deviation measurements of WIP colour and colour contrast across seven *Chrysomya* species. Wing cells denoted are A: 2<sup>nd</sup> posterior, B: radial 4 + 5, C: discal medial, D: anterior cubital, E: radial 2 + 3. Measurements were made for RGB, CIELab, and blowfly colour space. Measurements of the whole wing were also made.



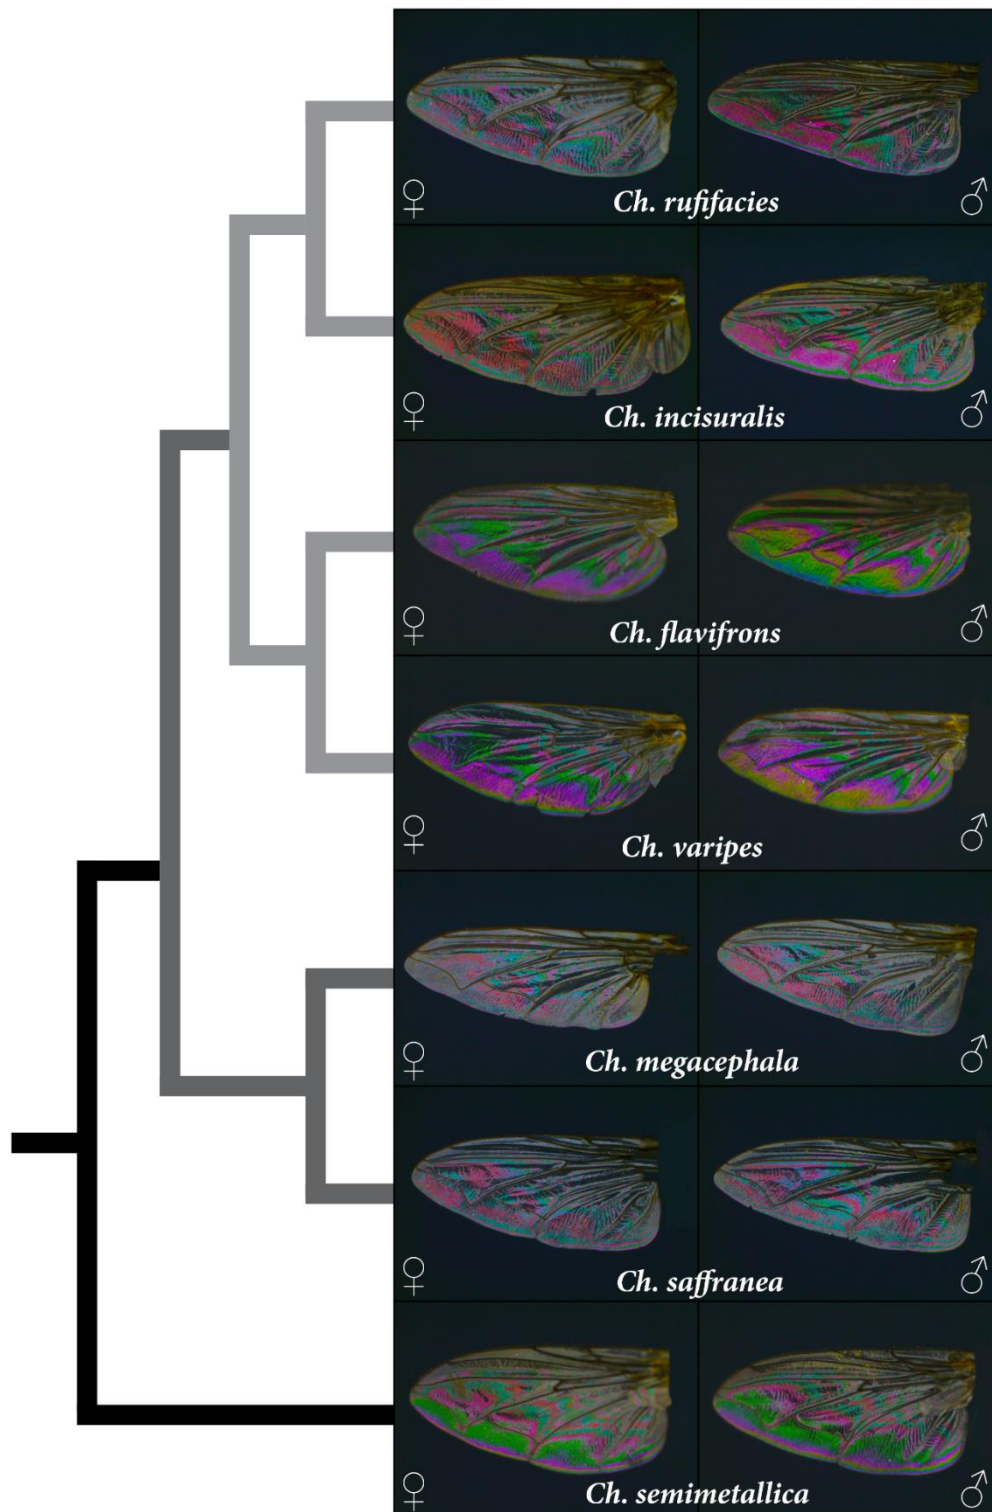

**Figure 2.** WIP variation among seven species of Australian *Chrysomya* (Diptera: Calliphoridae). Images captured with an MZI16A stereomicroscope mounted with a Leica DFC295 digital microscope colour camera. All photos were taken at the same magnification, under standardised and uniformly diffuse lighting provided by a Leica LED5000 HDI illuminator. To improve figure clarity, the contrast and saturation of each WIP were raised by 40% in Adobe Lightroom 2019. The final figure was edited with Adobe InDesign 2019. The reduced phylogeny of the seven Australian species is based on Singh et al. 2011. Clade I represented by light grey branches, Clade II by dark grey branches, and Clade III by black branches.

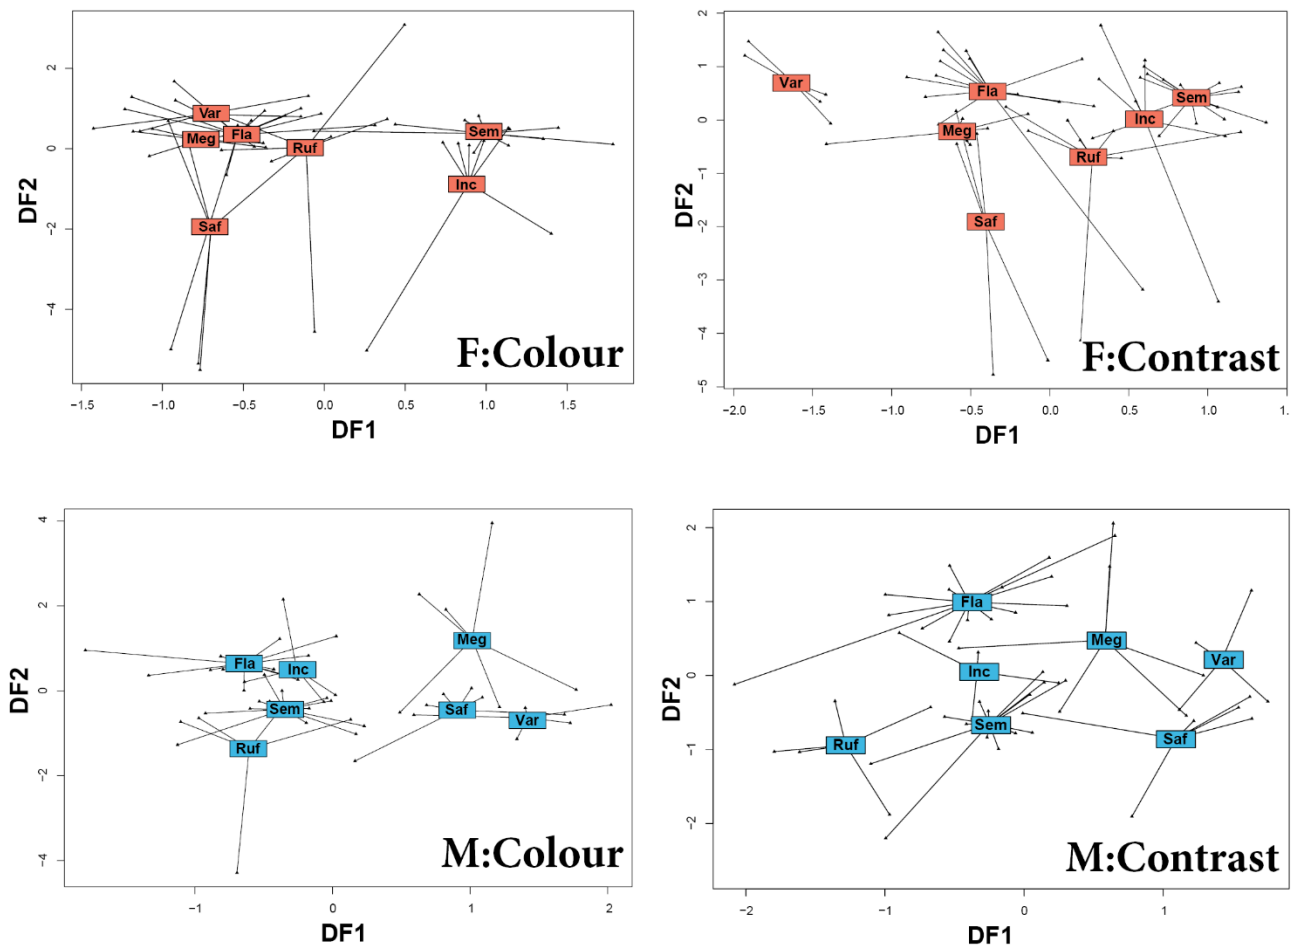

**Figure 3.** Quantitative differences in the wing interference patterns (WIPs) of male (M) and female (F) Australian *Chrysomya* represented by discriminant factors 1 (DF1) and 2 (DF2). Results are from a redundancy discriminant analysis of WIP colour (as represented by average measurements of Rh5, Rh6, and Rh1 values) and WIP colour contrast (as represented by standard deviations in Rh5, Rh6, and Rh1 values). All measurements were made in ‘blowfly visual space’ using the receptor sensitivities of *Calliphora* in the Multispectral Image Analysis and Calibration Toolbox for ImageJ (MICA toolbox) (Troscianko et al. 2019).

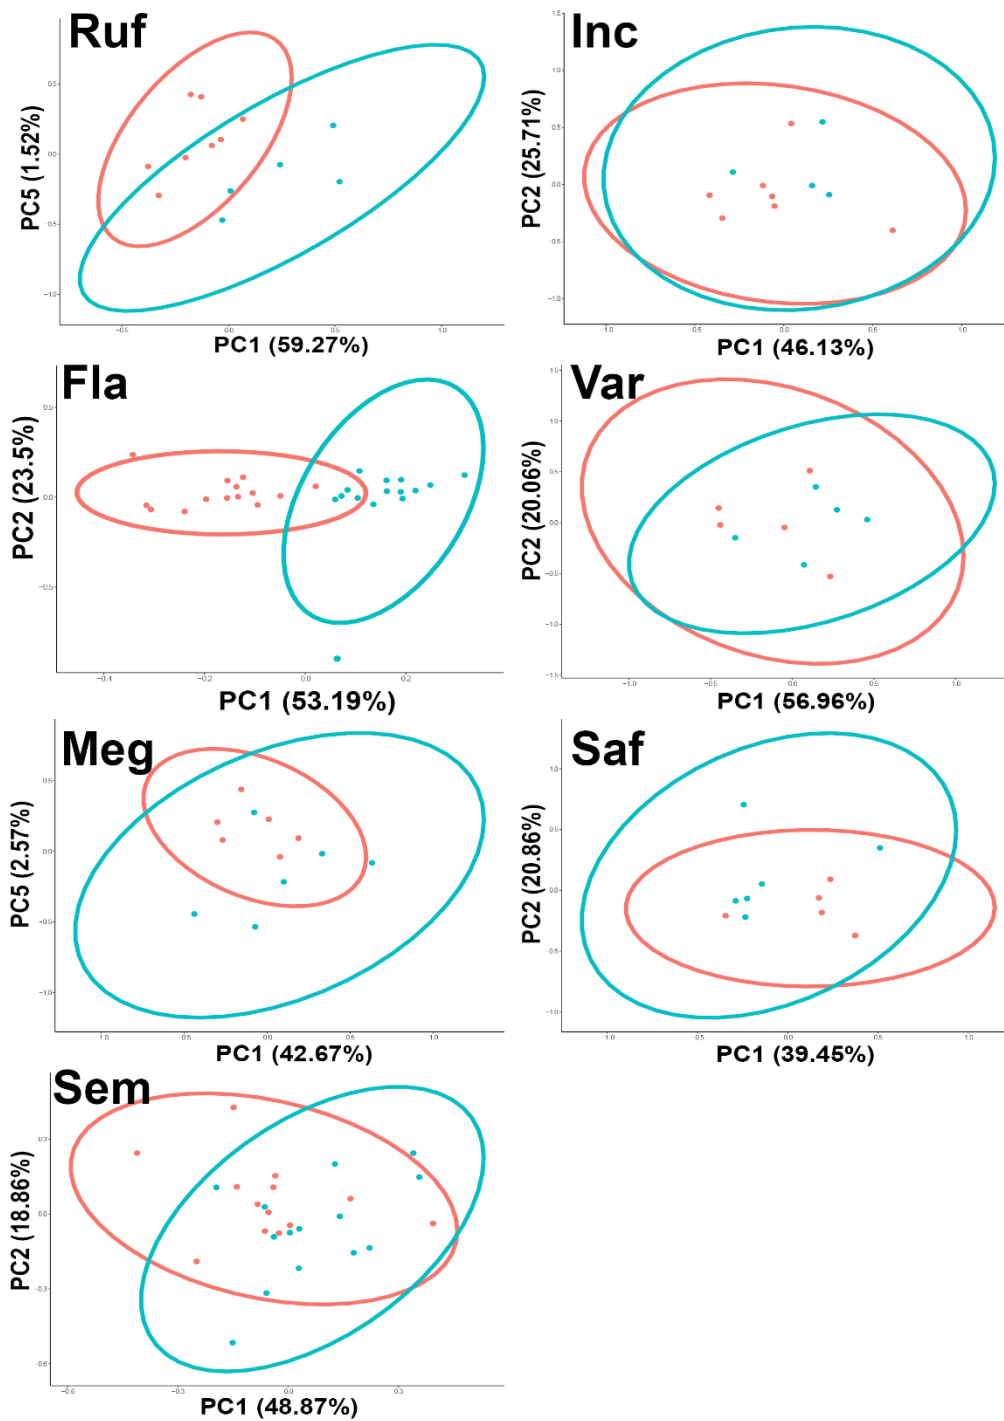

**Figure 4.** PCA plots of sex-specific differences in the ‘blowfly’ average colour of WIPs (mean Rh1, Rh5 and Rh6 values). The blue dots and ellipses represent males, while red dots and ellipses represent females. All measurements were made in ‘blowfly visual space’ using the receptor sensitivities of *Calliphora* in the Multispectral Image Analysis and Calibration Toolbox for ImageJ (MICA toolbox) (Troscianko et al. 2019).



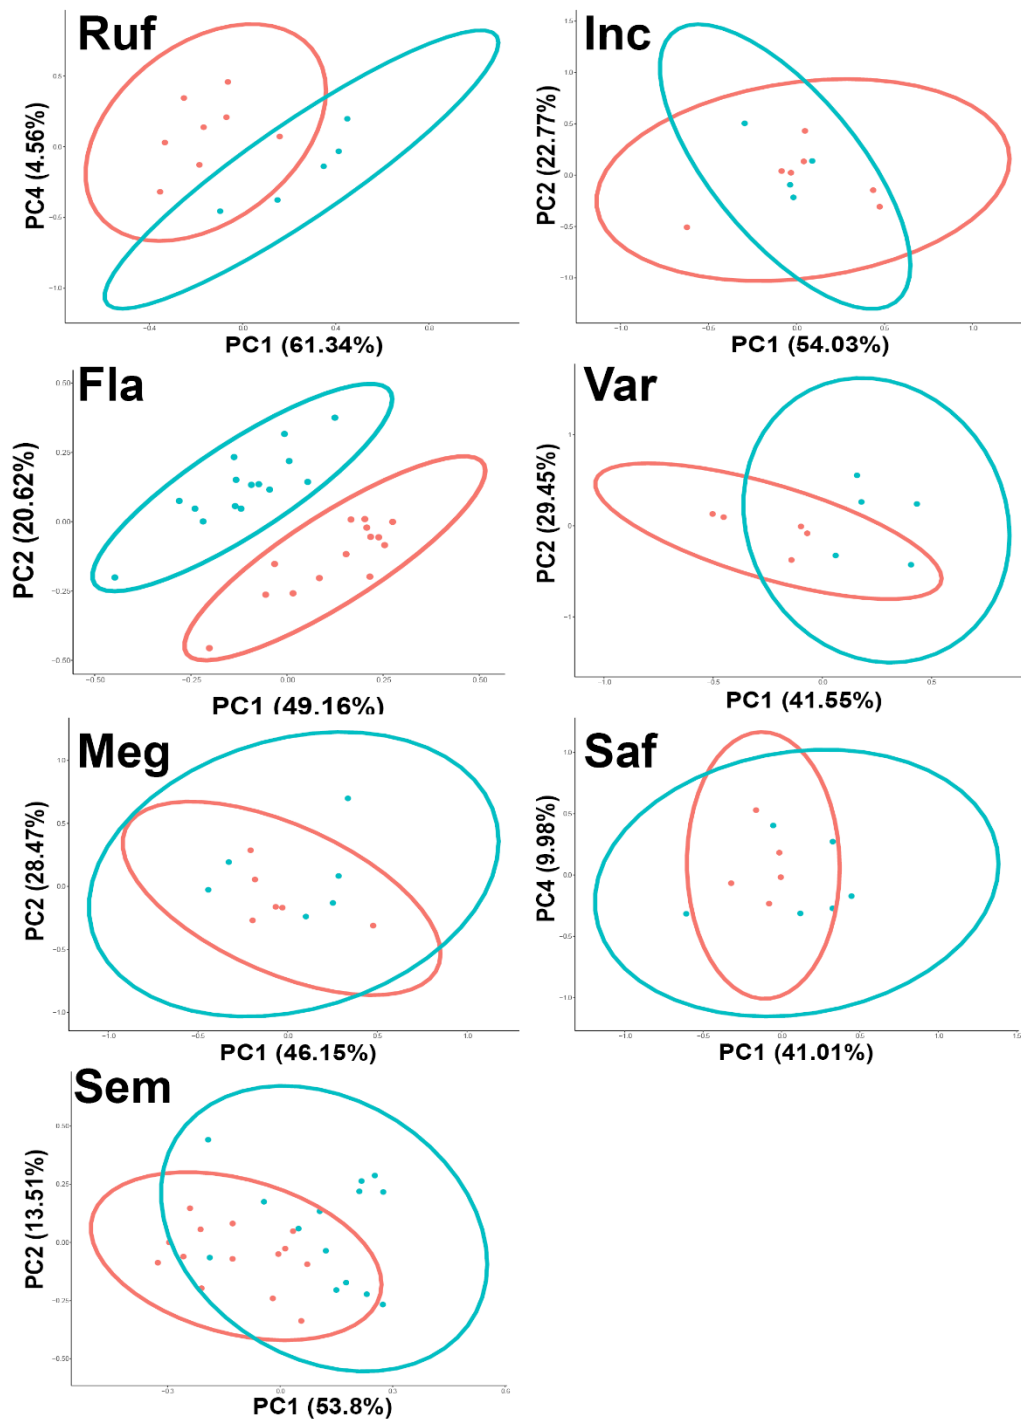

**Figure 5.** PCA plots of sex-specific differences in the 'blowfly' colour contrast of WIPs (standard deviation in Rh1, Rh5 and Rh6 values). The blue dots and ellipses represent males, while red dots and ellipses represent females. All measurements were made in 'blowfly visual space' using the receptor sensitivities of *Calliphora* in the Multispectral Image Analysis and Calibration Toolbox for ImageJ (MICA toolbox) (Troscianko et al. 2019).

**Table 1.** Pairwise comparisons between species, based on redundancy discriminant analysis of WIP colour (as represented by average measurements of Rh5, Rh6, and Rh1 values) and WIP colour contrast (as represented by standard deviations in Rh5, Rh6, and Rh1 values). All measurements were made in ‘blowfly visual space’ using the receptor sensitivities of *Calliphora* in the Multispectral Image Analysis and Calibration Toolbox for ImageJ (MICA toolbox) (Troscianko et al. 2019). Bold values indicate significant differences. F = Female, M = Male.

| <b>F_Colour</b>   | Fla           | Inc           | Meg           | Ruf           | Saf           | Sem           |
|-------------------|---------------|---------------|---------------|---------------|---------------|---------------|
| Inc               | 0.0567        | -             | -             | -             | -             | -             |
| Meg               | 0.88          | <b>0.0042</b> | -             | -             | -             | -             |
| Ruf               | 0.6363        | 0.3399        | 0.6363        | -             | -             | -             |
| Saf               | <b>0.042</b>  | 0.3399        | 0.2181        | 0.2289        | -             | -             |
| Sem               | <b>0.0042</b> | <b>0.042</b>  | <b>0.0042</b> | <b>0.007</b>  | <b>0.0042</b> | -             |
| Var               | 0.6363        | <b>0.009</b>  | 0.133         | 0.5052        | 0.0745        | <b>0.0042</b> |
| <b>F_Contrast</b> | Fla           | Inc           | Meg           | Ruf           | Saf           | Sem           |
| Inc               | 0.0952        | -             | -             | -             | -             | -             |
| Meg               | 0.1598        | <b>0.0952</b> | -             | -             | -             | -             |
| Ruf               | <b>0.0382</b> | 0.376         | <b>0.0385</b> | -             | -             | -             |
| Saf               | <b>0.021</b>  | <b>0.1221</b> | 0.1598        | 0.2719        | -             | -             |
| Sem               | <b>0.0052</b> | 0.3392        | 0.0052        | 0.0052        | 0.006         | -             |
| Var               | <b>0.042</b>  | <b>0.006</b>  | 0.0105        | 0.006         | 0.021         | <b>0.0052</b> |
| <b>M_Colour</b>   | Fla           | Inc           | Meg           | Ruf           | Saf           | Sem           |
| Inc               | 0.38          | -             | -             | -             | -             | -             |
| Meg               | <b>0.0026</b> | 0.1802        | -             | -             | -             | -             |
| Ruf               | <b>0.0026</b> | <b>0.0378</b> | <b>0.0117</b> | -             | -             | -             |
| Saf               | <b>0.0026</b> | <b>0.0134</b> | 0.1155        | <b>0.0126</b> | -             | -             |
| Sem               | <b>0.0026</b> | <b>0.0315</b> | <b>0.0026</b> | 0.0692        | <b>0.0026</b> | -             |
| Var               | <b>0.0026</b> | <b>0.0158</b> | 0.064         | <b>0.0275</b> | 0.2604        | <b>0.0026</b> |
| <b>M_Contrast</b> | Fla           | Inc           | Meg           | Ruf           | Saf           | Sem           |
| Inc               | <b>0.0338</b> | -             | -             | -             | -             | -             |
| Meg               | <b>0.0115</b> | 0.189         | -             | -             | -             | -             |
| Ruf               | <b>0.0052</b> | <b>0.0225</b> | <b>0.0093</b> | -             | -             | -             |
| Saf               | <b>0.003</b>  | <b>0.0238</b> | <b>0.0289</b> | <b>0.0105</b> | -             | -             |
| Sem               | <b>0.003</b>  | 0.0696        | <b>0.003</b>  | <b>0.003</b>  | <b>0.003</b>  | -             |
| Var               | <b>0.003</b>  | <b>0.014</b>  | 0.1722        | <b>0.0145</b> | <b>0.0338</b> | <b>0.003</b>  |
